# Supplementary material
Source: Springer Nature journal article supplement (https://www.springermedizin.de/resource/supplementary/12967_2013_1702_MOESM3_ESM.pdf/9575148)
Supplement: MOESM3 [file 9575148]

**Additional file 3. miRNA expression profiles from eight samples by Agilent microarray (miR release v. 16).** Eight FFPE samples (four NPC, four control) were analyzed using an unpaired *t*-test. miRNAs with significant up or down regulations (fold change>2.0 and *p*<0.05) are listed. Only miRNAs where  $\geq 2$  samples had raw values > 20.0 are presented .

| miRNA                                         | p-Value | Fold Change (Abs) |
|-----------------------------------------------|---------|-------------------|
| <b><i>Down Regulated</i></b>                  |         |                   |
| hsa-miR-133b                                  | 0.014   | 688.8             |
| hsa-miR-451                                   | 0.025   | 6.1               |
| hsa-miR-195                                   | 0.002   | 6.0               |
| hsa-miR-497                                   | 0.009   | 5.2               |
| hsa-miR-199b-5p                               | 0.040   | 4.0               |
| hsa-miR-486-5p                                | 0.022   | 3.9               |
| hsa-miR-1275                                  | 0.012   | 3.4               |
| hsa-miR-100                                   | 0.037   | 3.0               |
| hsa-miR-199a-3p                               | 0.046   | 2.7               |
| hsa-miR-3663-3p                               | 0.019   | 2.5               |
| hsa-miR-3138                                  | 0.016   | 2.3               |
| hsa-miR-125b                                  | 0.027   | 2.2               |
| hsa-let-7b                                    | 0.001   | 2.1               |
| <b><i>Up-Regulated</i></b>                    |         |                   |
| hsa-miR-196b                                  | 0.008   | 47.3              |
| hsa-miR-203                                   | 0.013   | 41.6              |
| hsa-miR-18a                                   | 0.037   | 14.0              |
| hsa-miR-17*                                   | 0.037   | 8.9               |
| hsa-miR-149                                   | 0.040   | 7.1               |
| hsa-miR-141                                   | 0.046   | 4.9               |
| hsa-miR-221                                   | 0.025   | 4.2               |
| hsa-miR-93                                    | 0.003   | 3.3               |
| hsa-miR-3651                                  | 0.002   | 3.1               |
| hsa-miR-1274a                                 | 0.007   | 3.0               |
| hsa-miR-17                                    | 0.003   | 2.4               |
| hsa-miR-1274b                                 | 0.018   | 2.4               |
| hsa-miR-25                                    | 0.002   | 2.3               |
| hsa-miR-1260                                  | 0.041   | 2.3               |
| hsa-miR-20a                                   | 0.019   | 2.2               |
| hsa-miR-130b                                  | 0.014   | 2.2               |
| hsa-miR-106b                                  | 0.006   | 2.1               |
| hsa-miR-15b                                   | 0.039   | 2.0               |
| <b><i>EBV Specific (All up-regulated)</i></b> |         |                   |
| ebv-miR-BART4*                                | 0.024   | 100.0             |
| ebv-miR-BART6-5p                              | 0.043   | 99.9              |
| ebv-miR-BART6-3p                              | 0.041   | 92.8              |
| ebv-miR-BART5                                 | 0.027   | 69.0              |
